# Supplementary material
Source: MDPI journal article supplement (https://www.mdpi.com/1996-1073/15/4/1419)
Supplement: s1 [file s1]

Supporting Information for:

## Improvement in Electrochemical Properties of Lithium Metal by Heat Treatment: Changes in Chemical Composition of Native and Solid Electrolyte Interphase Films

Paul Maldonado Nogales, Hee-Youb Song, Mun-Hui Jo and Soon-Ki Jeong \*

Department of Energy Systems Engineering, Soonchunhyang University, Soonchunhyang-ro 22-gil, Sinchang-myeon, Asan-si 31538, Chungcheongnam-do, Korea; paul\_mald@hotmail.com (P.M.N.); youbi0815@gmail.com (H.-Y.S.); munhui58@gmail.com (M.-H.J.)

\* Correspondence: hamin611@sch.ac.kr; Tel.: +82-41-530-1313

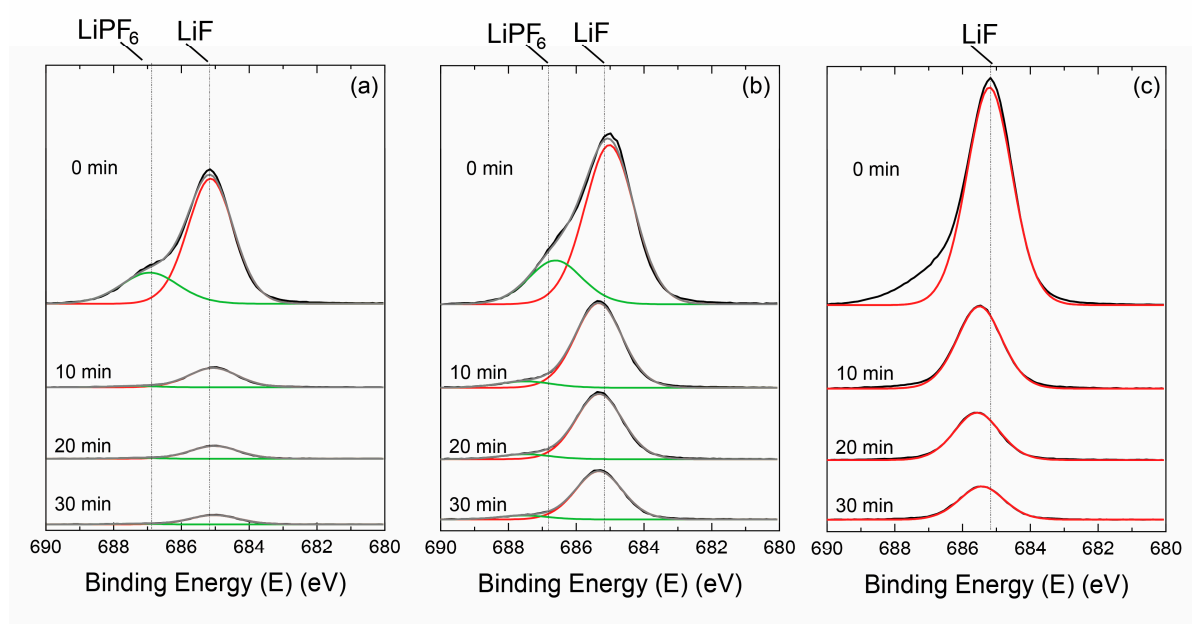

**Figure S1.** XPS profiles of F 1s for the heat-treated lithium metal at (a) 26.8, (b) 38.7, and (c) 55.1 °C after immersion in 1 M LiPF<sub>6</sub>/EC + EMC (1:1, v/v).
